# Supplementary material
Source: PubMed Central journal article supplement (PMC6715388)
Supplement: jci-129-128437-s355.pdf [file jci-129-128437-s355.pdf]

(A) sLeA expression on murine and human tumor cells

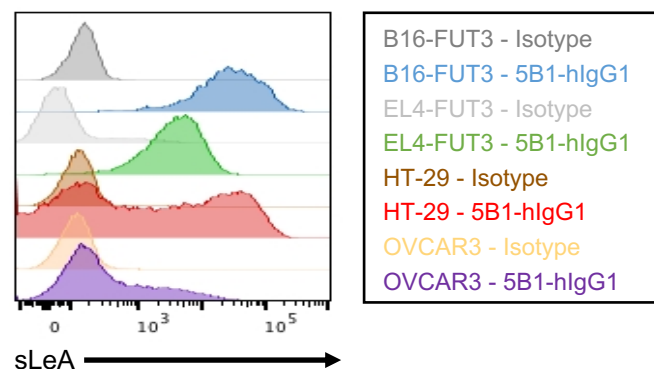

(B) Binding of different sLeA-targeting Ab clones to sLeA+ tumor cells

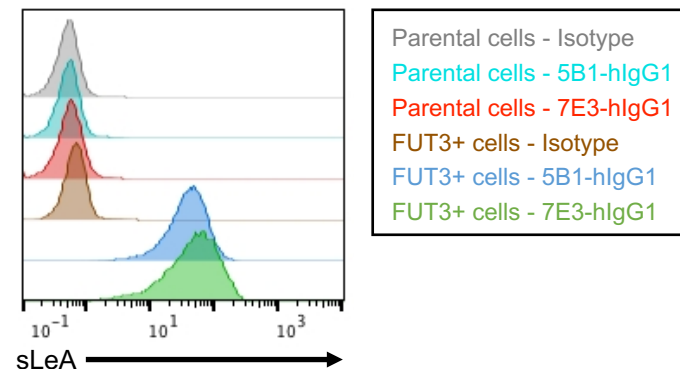

(C) Binding of different sLeA-targeting Ab clones to synthetic sLeA - indirect ELISA

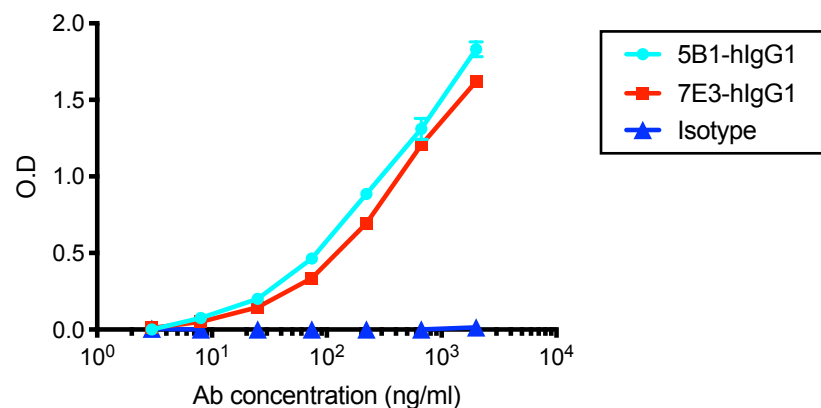

**Figure S1**

**(A)** Murine tumor cells were transduced to stably express the human enzyme Fucosyltransferase III (FUT3), which synthesizes sLeA. *FUT3*-transduced murine tumor cells and human tumor cells (HT-29 and OVCAR3) were labeled with an Anti-sLeA primary Ab (clone 5B1-hlgG1) followed by Alexa-488-conjugated-goat anti-human IgG. The panel shows a representative experiment ( $n > 3$ ), showing similar results. **(B)** To validate binding of 5B1 and 7E3 Ab clones to surface sLeA - cells were labeled with an Anti-sLeA primary Abs followed by Alexa-488-conjugated-goat anti-human IgG. The panel shows a representative experiment ( $n > 3$ ), showing similar results. **(C)** Assay plates were coated and incubated with synthetic sLeA, blocked and incubated with serial dilutions of clones 5B1-hlgG1, 7E3-hlgG1 or non-relevant hlgG1 isotype control Abs. HRP-conjugated goat anti-human IgG Abs, followed by addition of TMB substrate were used for detection.

(A) Binding of Anti-sLeA Ab variants (murine Fc)

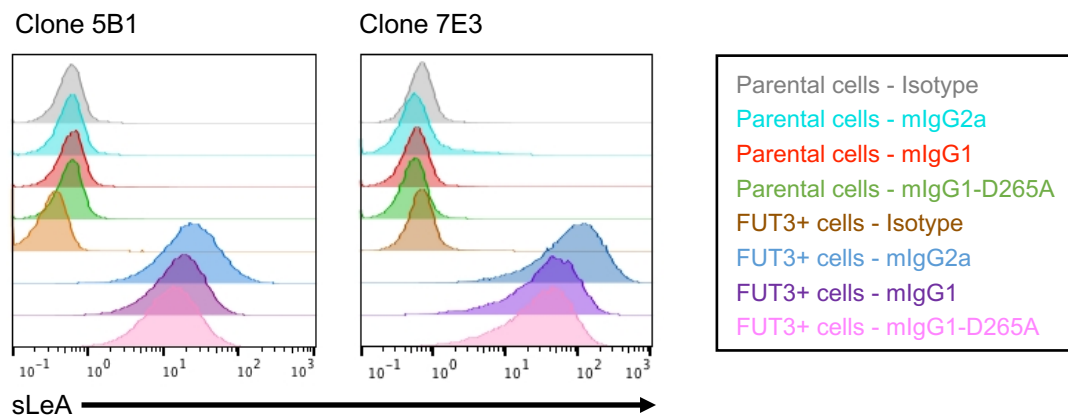

(B) Binding of Anti-sLeA Ab variants to sLeA+ cells (human Fc)

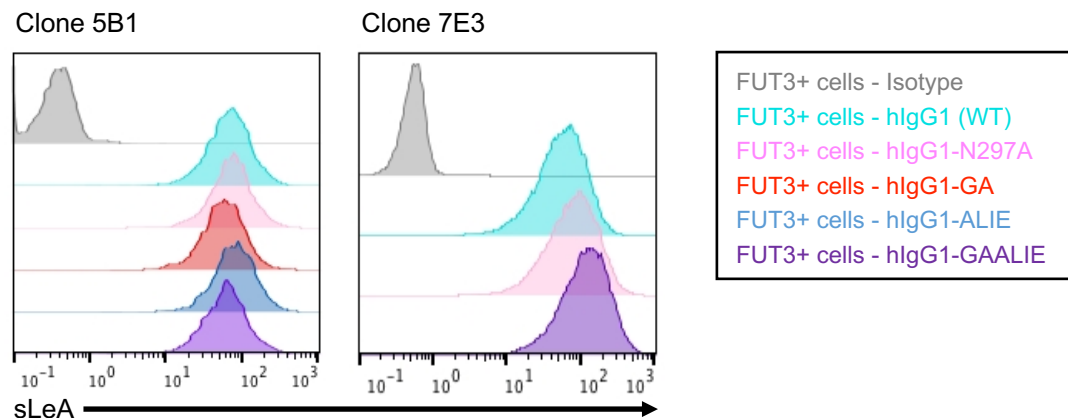

**Figure S2**

Murine tumor cells were transduced to stably express the human enzyme Fucosyltransferase III (FUT3), which synthesizes sLeA. To validate binding of various sLeA-targeting Abs with a murine Fc **(A)** or human Fc **(B)** - cells were labeled with an Anti-sLeA primary Abs followed by Alexa-488-conjugated-goat anti-human IgG or anti-mouse IgG and analyzed by flow cytometry. Both panels show a representative experiment (n>3), showing similar results.

(A) sLeA-targeting Abs protect mice from sLeA+ tumor challenge comparably to gp75-targeting Abs

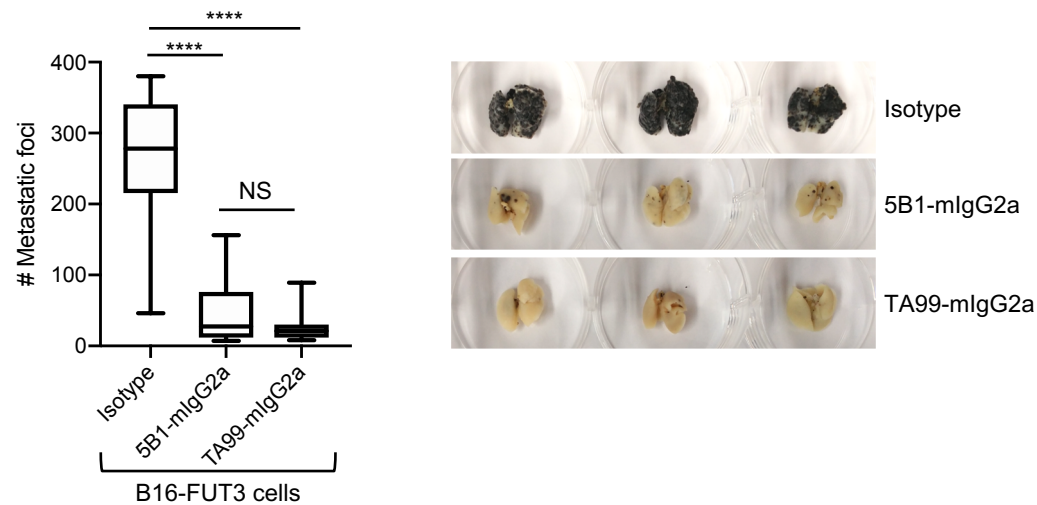

(B) 5B1 Ab-mediated anti-tumor effect relies on activating FcγRs

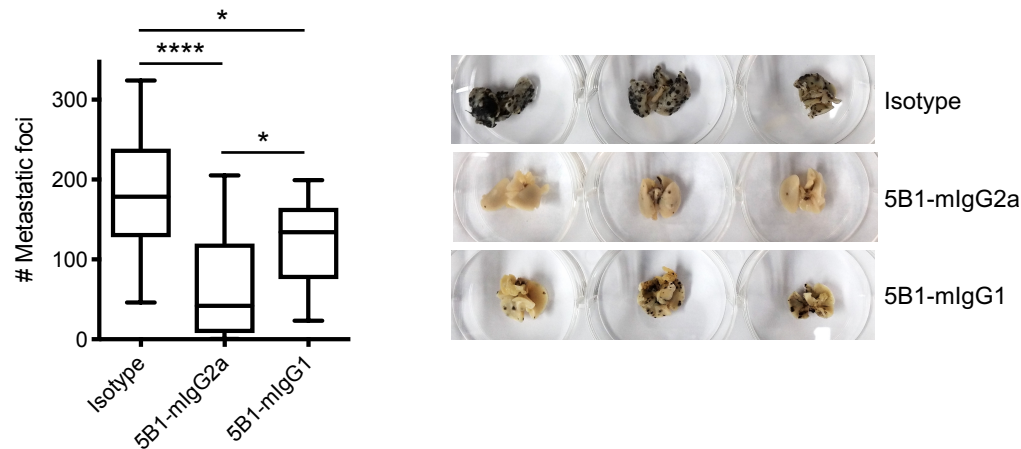

(C) 5B1-hIgG1 activity relies on FcγR engagement

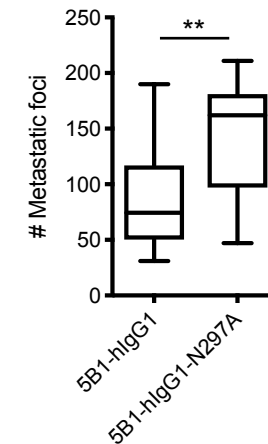

**Figure S3**

WT C57BL/6 mice (**A, B**) or FcγR-humanized mice (**C**) were inoculated IV with  $5 \times 10^5$  B16-FUT3 tumor cells. 100 μg of anti-sLeA Abs (5B1-mIgG2a or 5B1-mIgG1 or 5B1-hIgG1 or 5B1-hIgG1-N297A), anti-gp75 (TA99-mIgG2a) or isotype-matched control Abs were administered IP on days 1,4,7 and 11. 14 days post-inoculation, mice were euthanized, lungs were excised and fixed, and metastatic foci were counted. For all panels, data pooled from n=2-3 experiments, n≥11/group. Panels A, B show representative images of three excised lungs from each group. \* p<0.05, \*\* p<0.01, \*\*\*\* p<0.0001. For all panels, the box extends from 25th to 75th percentile, the line within the box represents the median value and the whiskers correlate to 5-95 percentiles.

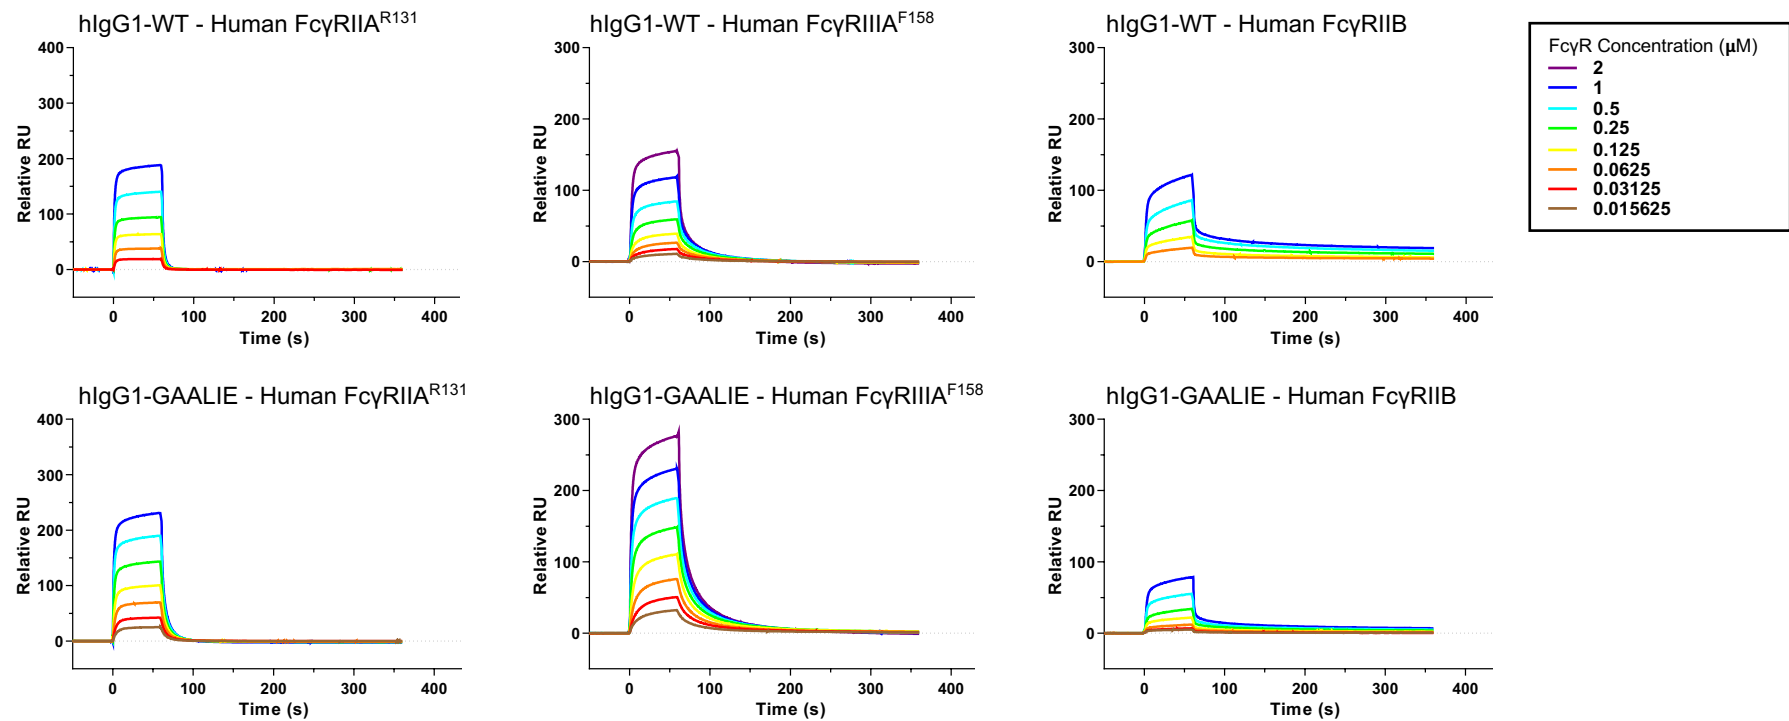

**Figure S4**

Binding affinity of hlgG1 Fc variants to human FcγRs was determined by SPR analysis. Representative SPR sensorgrams of hlgG1-WT and hlgG1-GAALIE variants binding to the various classes of hFcγRs (see table 1 for the affinity measurements and fold change in affinity over hlgG1-WT).

(A) Antibody half-life in vivo

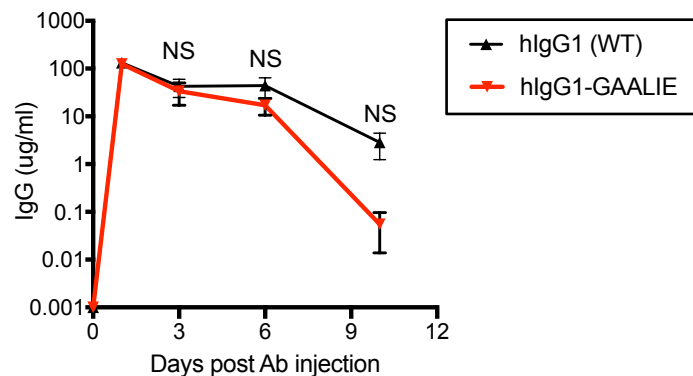

(B) ADCC in vivo - platelet depletion

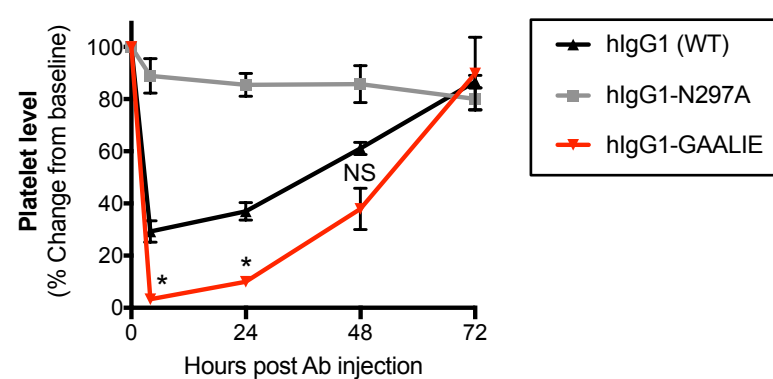

**Figure S5**

**(A) Half-life of hIgG1 variants in FcγR-humanized mice** – FcγR-humanized mice were injected IV with 100 µg of hIgG1 Fc variants, bled at indicated time points, and serum IgG levels were determined by ELISA. n=4/group. **(B) ADCC in vivo** – FcγR-humanized mice were injected intravenously with 10 µg of hIgG1 Fc variants (clone 6A6, targeting a platelet-associated antigen). hIgG1-N297A (was included as control. Mice were bled at the indicated time points and platelet numbers were analyzed using an Advia 120 hematology system. Values represent the mean (± SEM) percentage change in platelet number relative to 0h. n=3/group. For hIgG1-WT vs. hIgG1-GAALIE at 4h and 24h - \* p<0.05.

### (A) Validation of NK cell depletion in murine lungs

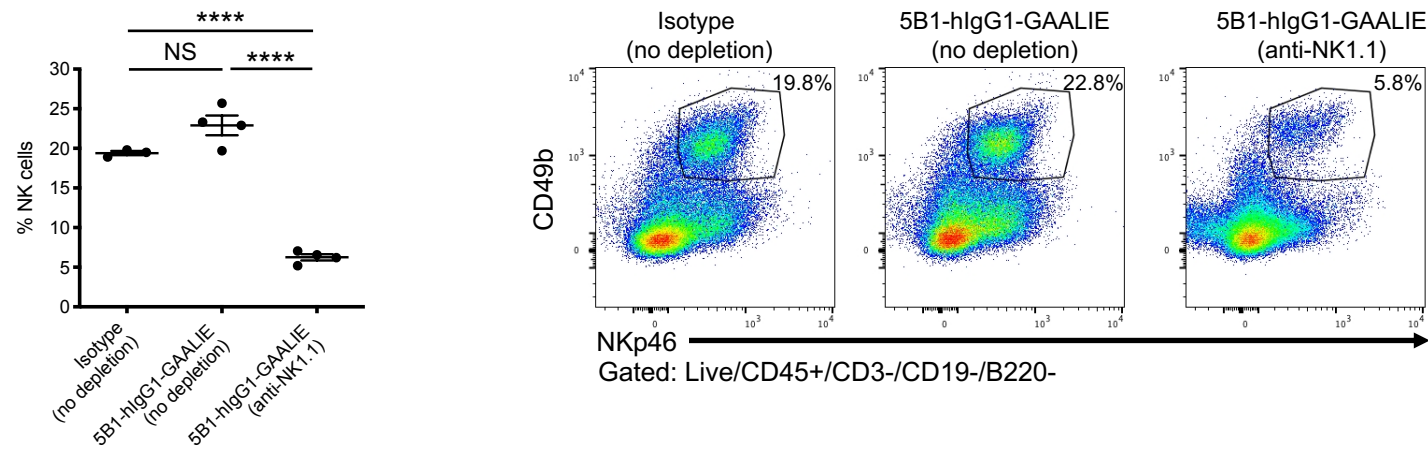

### (B) NK cell depletion does not hamper anti-tumor effect of sLeA-targeting Abs in FcγR-humanized mice

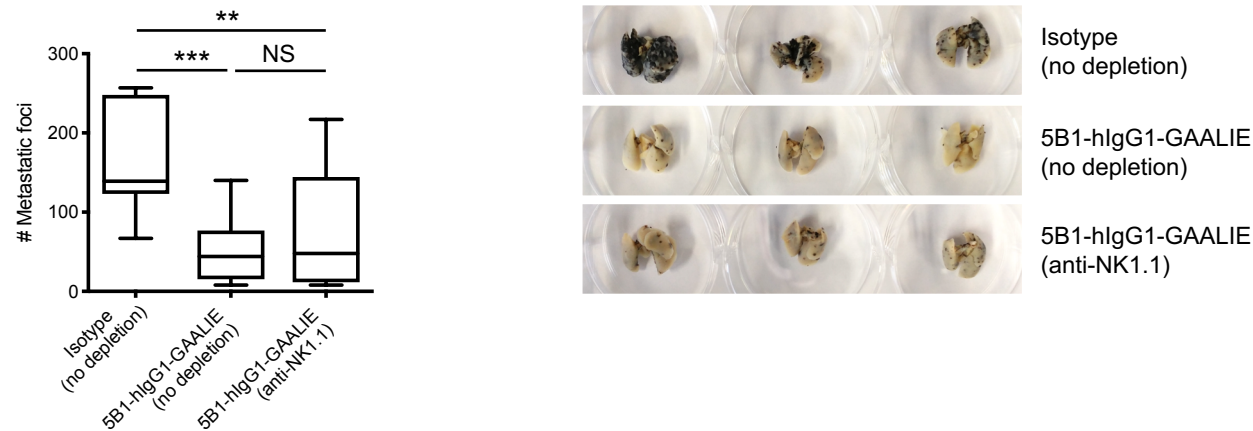

**Figure S6**

FcγR-humanized mice were inoculated IV with  $5 \times 10^5$  B16-FUT3 tumor cells. 100 μg of anti-sLeA Abs (5B1-hlgG1-GAALIE with G236A/A330L/I332E mutations) or isotype-matched control Abs were administered IP on days 1, 4, 7 and 11. NK cells were depleted using Intra-nasal administrations of 300 μg of anti-NK1.1 Abs on days -3, -1, 1, 4, 7, and 11. For all panels, 14 days post-inoculation, mice were euthanized, and lungs were excised. **(A) Validation of NK cell depletion** – Lungs were perfused, dissociated and stained for flow cytometry. NK cells were gated as follows: Live/CD45+/CD3-/CD19-/B220-/NKp46+/CD49b+ cells, and are presented as Mean ± SEM.  $n \geq 4$ /group. \*\*\*\*  $p < 0.0001$  (one-way ANOVA with Bonferroni's post-test). The panel summarizes the data obtained for all mice (left), and shows representative dot plots for a single mouse from each group (right). **(B) NK cell depletion does not hamper anti-tumor effect of sLeA-targeting Abs** – Lungs were excised and fixed, and metastatic foci were counted. Data pooled from  $n = 2$  experiments,  $n \geq 11$ /group, and shows representative images of three excised lungs from each group. \*\*  $p < 0.01$ , \*\*\*  $p < 0.001$  (one-way ANOVA with Bonferroni's post-test). The box extends from 25th to 75th percentile, the line within the box represents the median value and the whiskers correlate to 5-95 percentiles.

# anti-sLeA and anti-gp75 Abs demonstrate differential hFcγR-engagement requirements to confer anti-tumor activity

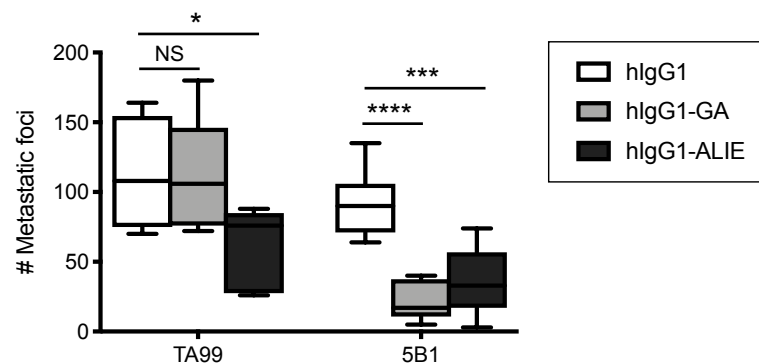

**Figure S7**

FcγR-humanized mice were inoculated IV with  $5 \times 10^5$  B16-FUT3 tumor cells. 100  $\mu$ g of anti-sLeA Abs (5B1-hIgG1 or 5B1-hIgG1-GA or 5B1-hIgG1-ALIE) or anti-gp75 (TA99-hIgG1 or TA99-hIgG1-GA or TA99-hIgG1-ALIE) or isotype-matched control Abs were administered IP on days 1,4,7 and 11. 14 days post-inoculation, mice were euthanized, lungs were excised and fixed, and metastatic foci were counted. For 5B1 - data pooled from  $n=2$  experiments,  $n=10-12$ /group. For TA99 -  $n=5$ /group. \*  $p < 0.05$ , \*\*\*  $p < 0.001$ , \*\*\*\*  $p < 0.0001$  (one-way ANOVA with Bonferroni's post-test). The box extends from 25th to 75th percentile, the line within the box represents the median value and the whiskers correlate to 5-95 percentiles.
